# Supplementary material for: Conversion of methane to C2 and C3 hydrocarbons over TiO2/ZSM-5 core–shell particles in an electric field
Source: Royal Society of Chemistry journal article supplement (doi:10.1039/c9ra06927e), 2019-01-01
Supplement: c9ra06927e1.pdf [file c9ra06927e1.pdf]

## Electronic Supplementary Information

### Conversion of methane to C<sub>2</sub> and C<sub>3</sub> hydrocarbons over TiO<sub>2</sub>/ZSM-5 core-shell particles in an electric field

Qiao Han,<sup>a</sup> Atsuhiko Tanaka,<sup>a</sup> Masayuki Matsumoto,<sup>a</sup> Akira Endo,<sup>b</sup> Yoshihiro Kubota<sup>a</sup> and Satoshi Inagaki<sup>\*ac</sup>

### Supplementary experimental procedure

#### Preparation of silicalite-1

Colloidal silica (Cataloid SI-30, 30.5 wt% SiO<sub>2</sub>, JGC Catalysts and Chemicals Ltd.) and de-ionized water were mixed and stirred for 5 min. Then, aqueous NaOH solution (40 wt%) was added to the solution, and stirred for further 5 min. Next, tetrapropylammonium bromide (TPABr) was added into the solution as a structure-directing agent (SDA), and the mixture was stirred gently for 40 min. The mixture with a molar composition 1.0 SiO<sub>2</sub>–0.103 NaOH–0.10 TPABr–40.5 H<sub>2</sub>O was taken into a 125-mL Teflon<sup>®</sup>-lined stainless-steel autoclave and kept statically at 175 °C for 24 h in a convection oven. The autoclave was taken out of the convection oven and cooled in an ice bath for 30 min. The obtained solid was recovered by filtration, washed several times with de-ionized water until the pH of the liquid phase reached around 7 and then dried overnight at 100 °C in a convection oven. To remove SDA, the as-synthesized silicalite-1 was calcined at 500 °C for 5 h in a muffle furnace with 2 °C min<sup>–1</sup> of a ramping rate. After cooling to room temperature, the white powder was obtained as calcined silicalite-1.

#### Isotopic oxygen exchange experiment

The <sup>16</sup>O<sub>2</sub>/<sup>18</sup>O<sub>2</sub> isotopic oxygen exchange experiments at 150 °C in an electric field was conducted using a quadrupole mass spectrometer (QGA; Hiden Analytical Ltd.). The TiO<sub>2</sub>(mc)/ZSM-5\_800 and TiO<sub>2</sub>\_800 samples were sieved to 355–500 μm and 100 mg of it was inserted into the reactor. The MS signals of *m/z* = 32 (<sup>16</sup>O<sub>2</sub>), 34 (<sup>16</sup>O<sup>18</sup>O), and 36 (<sup>18</sup>O<sub>2</sub>) were recorded. For the transient isothermal isotopic oxygen exchange experiment in an electric field, the sample was pretreated with <sup>16</sup>O<sub>2</sub>-containing gas (<sup>16</sup>O<sub>2</sub>: Ar = 5:55; total flow rate, 60 cm<sup>3</sup> (SATP) min<sup>–1</sup>) at 150 °C with an electric field. After turning off the electric field, <sup>18</sup>O<sub>2</sub>-containing gas (<sup>18</sup>O<sub>2</sub>: Ar = 5:55; total flow rate, 60 cm<sup>3</sup> (SATP) min<sup>–1</sup>) was fed until it reached plateau (ca. 10 min). The electric field (6 mA) was imposed (ca. 5 min), and then it was turning off. After that, the reaction gas was switched to the <sup>16</sup>O<sub>2</sub>-containing gas and the same procedure was repeated (ON/OFF of the electric field).

## Supplementary Figures

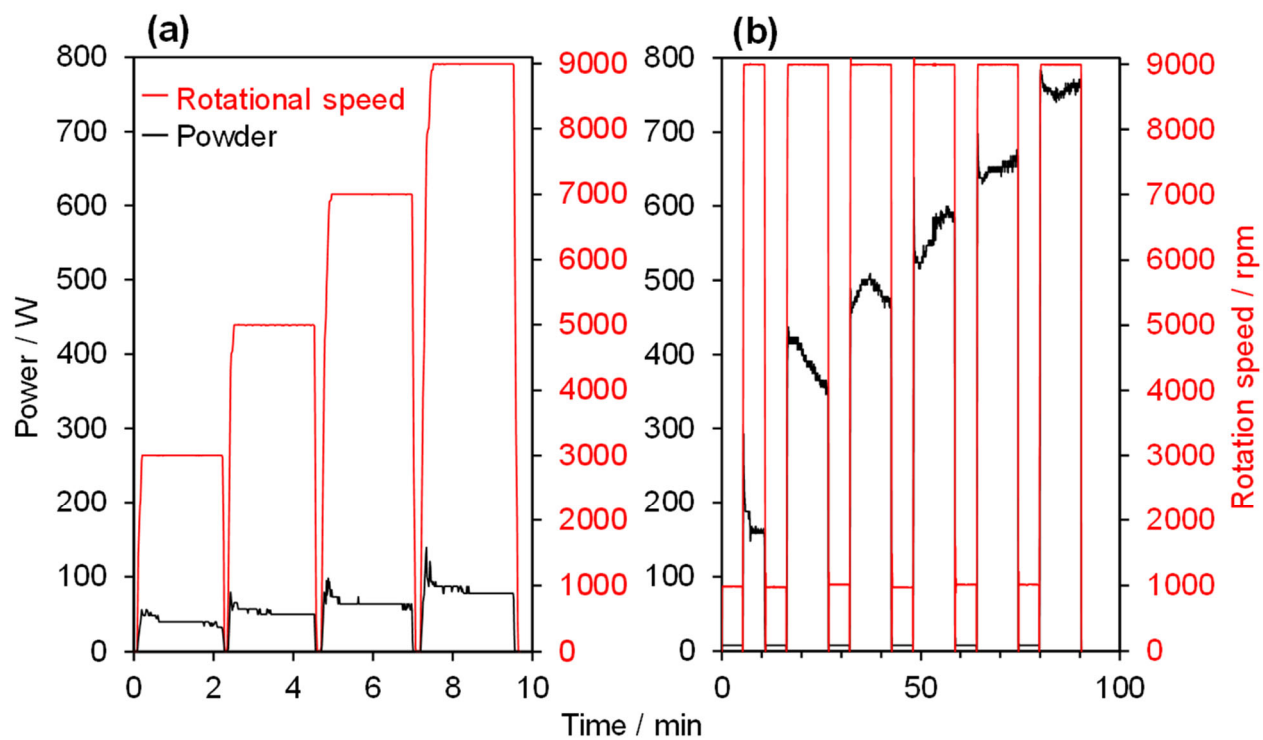

Figure S1. Time courses for the rotational speed of blades in a high performance powder processing machine and the power output (a) without any powders, and (b) with  $\text{TiO}_2$  and ZSM-5.

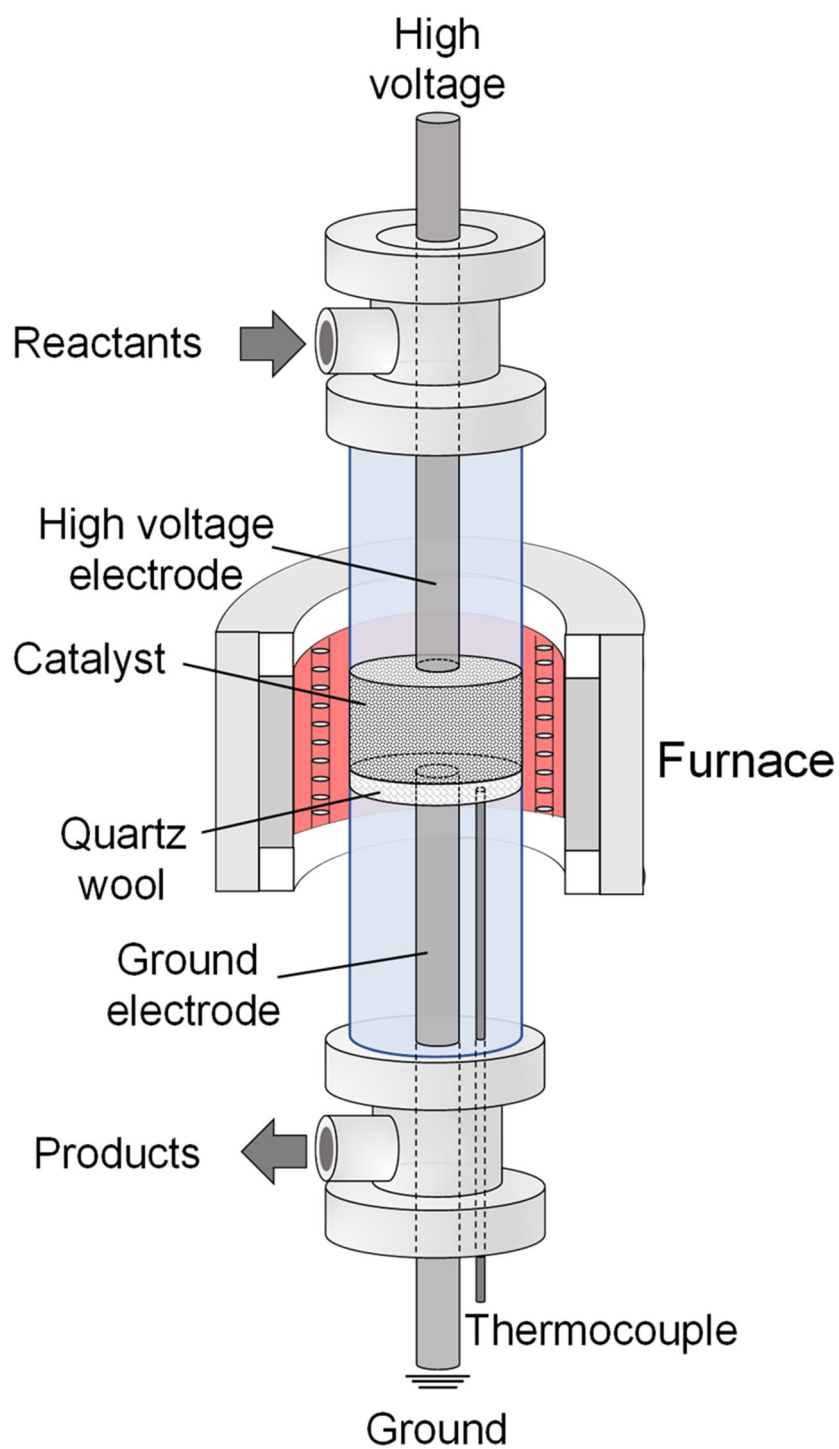

Figure S2. Schematic illustration of the reaction system.

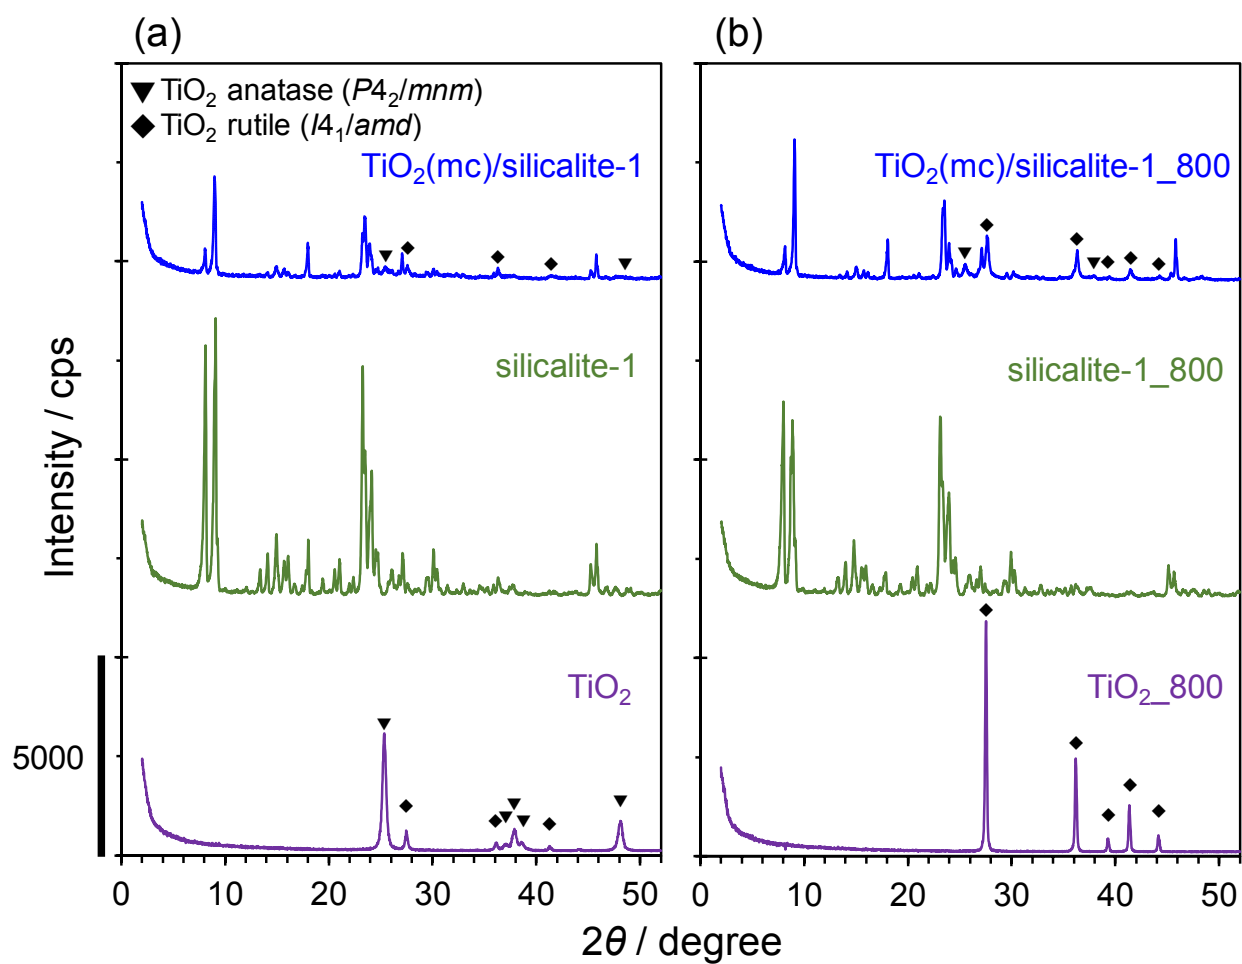

Figure S3. Powder XRD patterns of (a) pristine and (b) thermally-treated samples at 800 °C.

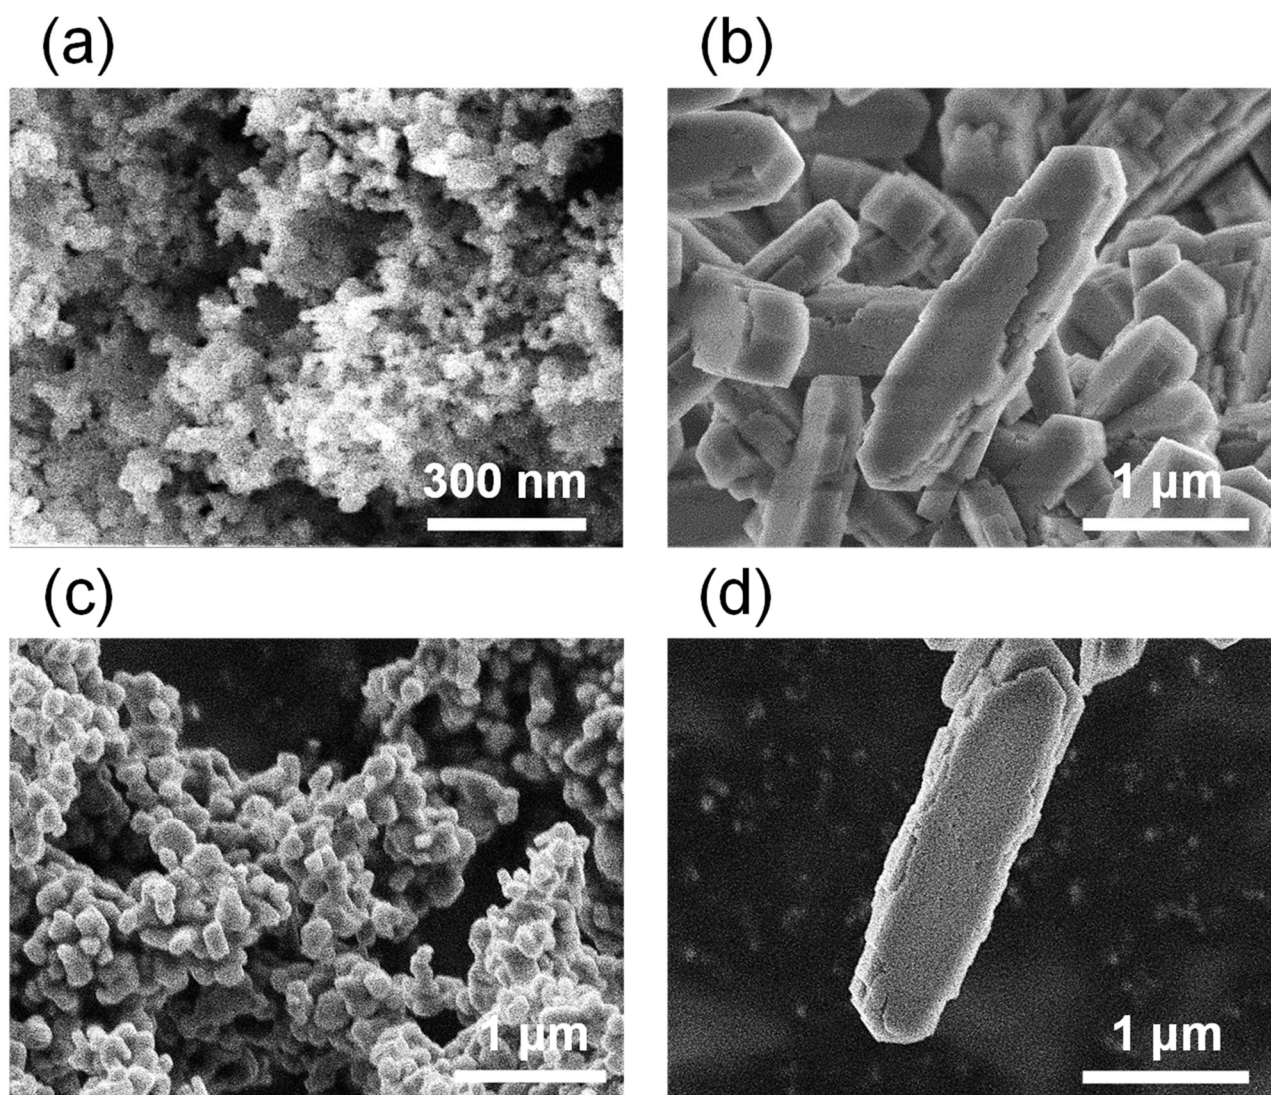

Figure S4. FE-SEM images of (a)  $\text{TiO}_2$ , (b) ZSM-5, (c)  $\text{TiO}_2$ \_800, and (d) ZSM-5\_800.

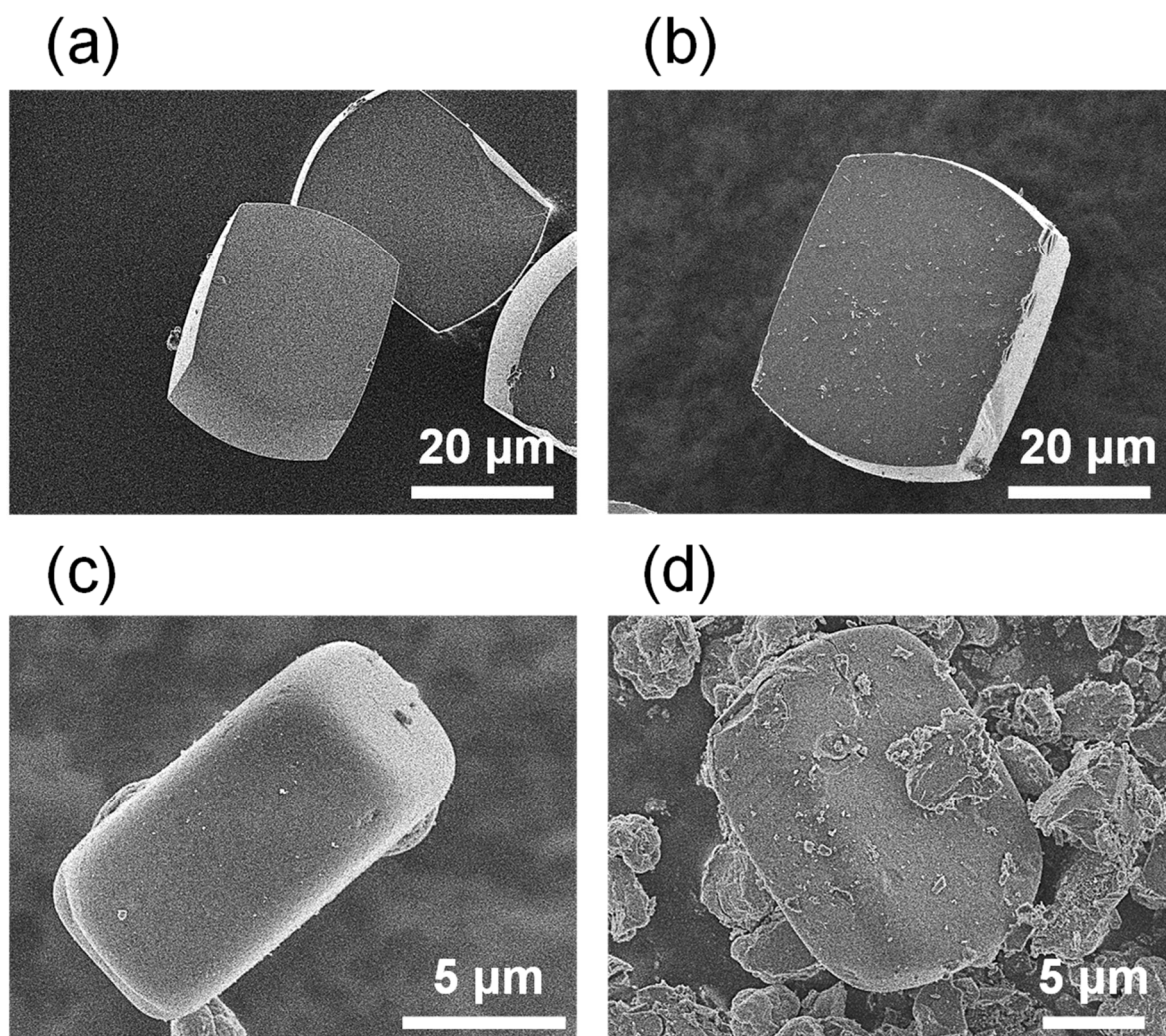

Figure S5. FE-SEM images of (a) silicalite-1, (b) silicalite-1\_800, (c) TiO<sub>2</sub>(mc)/silicalite-1, and (d) TiO<sub>2</sub>(mc)/silicalite-1\_800.

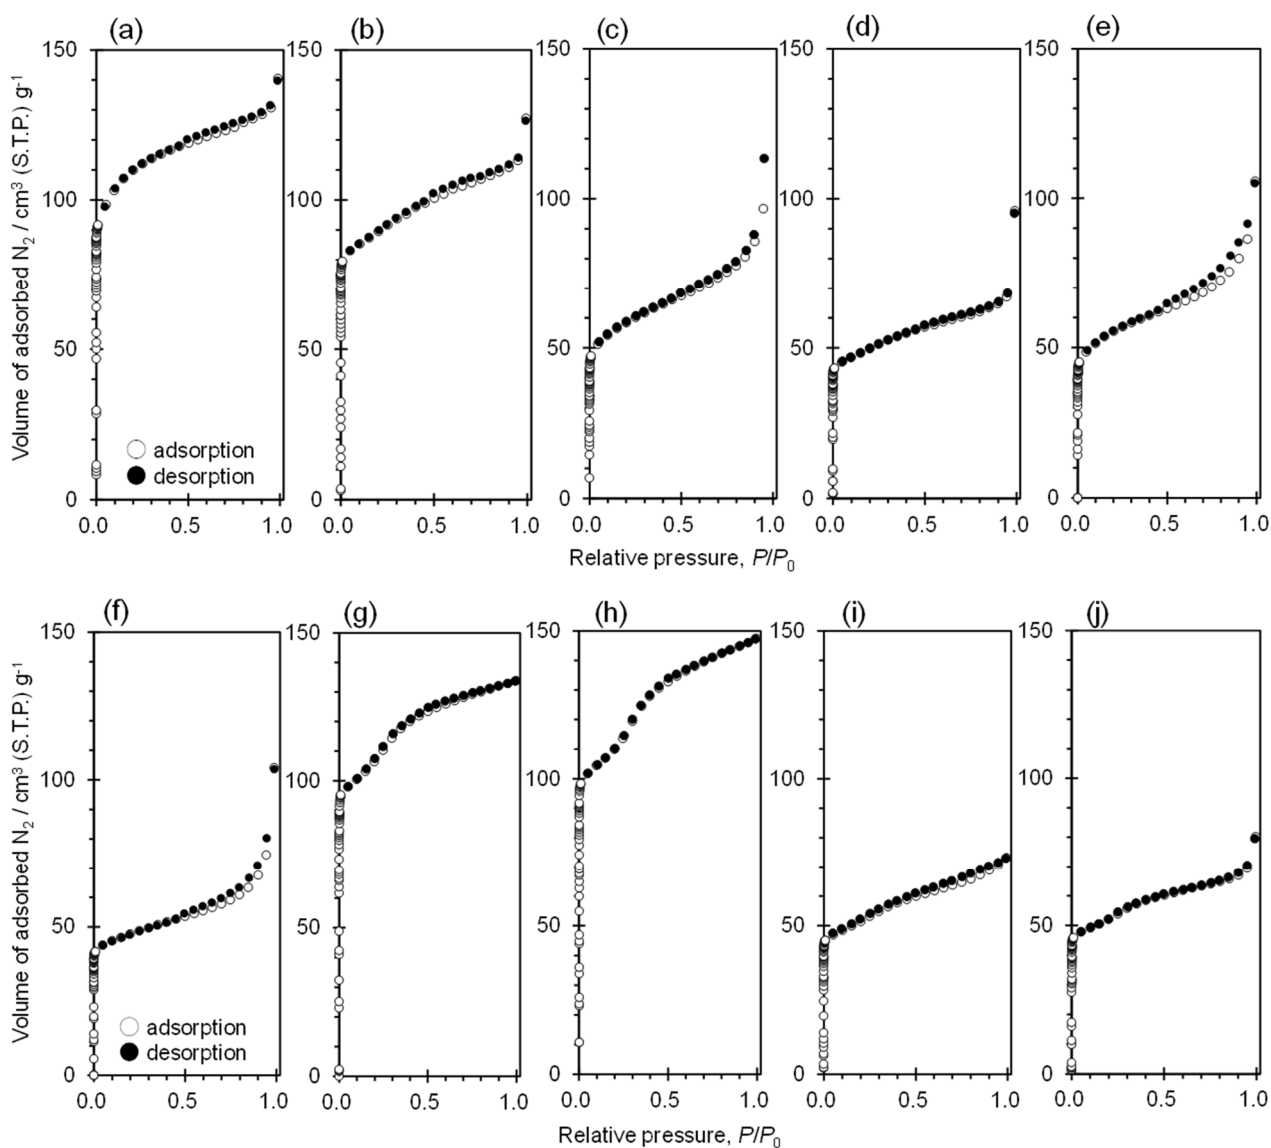

Figure S6. Nitrogen adsorption–desorption isotherms for (a) ZSM-5, (b) ZSM-5\_800, (c) TiO<sub>2</sub>(pm)/ZSM-5, (d) TiO<sub>2</sub>(pm)/ZSM-5\_800, (e) TiO<sub>2</sub>(mc)/ZSM-5, (f) TiO<sub>2</sub>(mc)/ZSM-5\_800, (g) silicalite-1, (h) silicalite-1\_800, (i) TiO<sub>2</sub>(mc)/silicalite-1, and (j) TiO<sub>2</sub>(mc)/silicalite-1\_800.

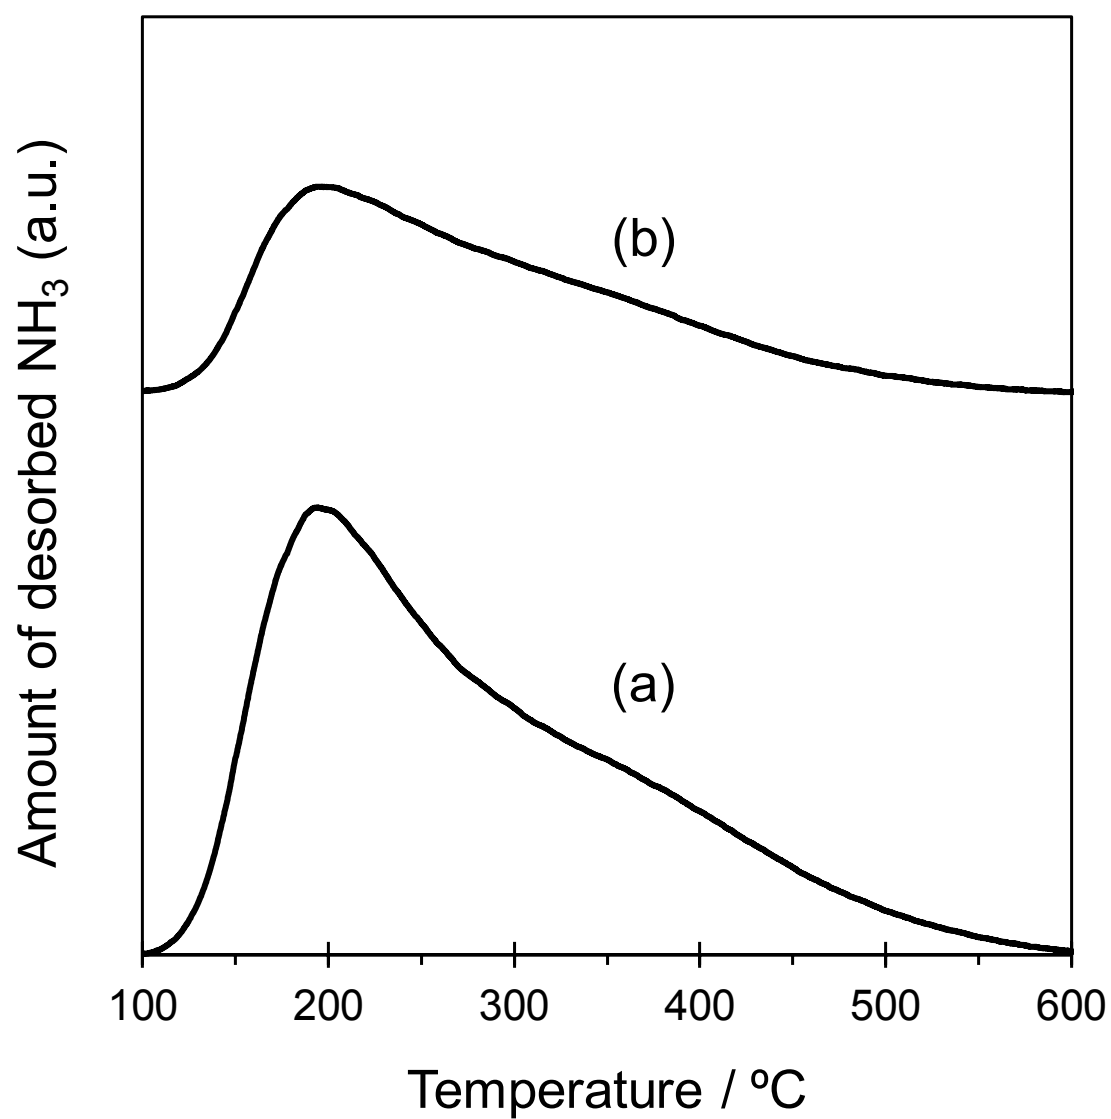

Figure S7.  $\text{NH}_3$ -TPD profiles of (a) ZSM-5\_800 (50 mg) and (b)  $\text{TiO}_2(\text{mc})/\text{ZSM-5}_800$  (50 mg).



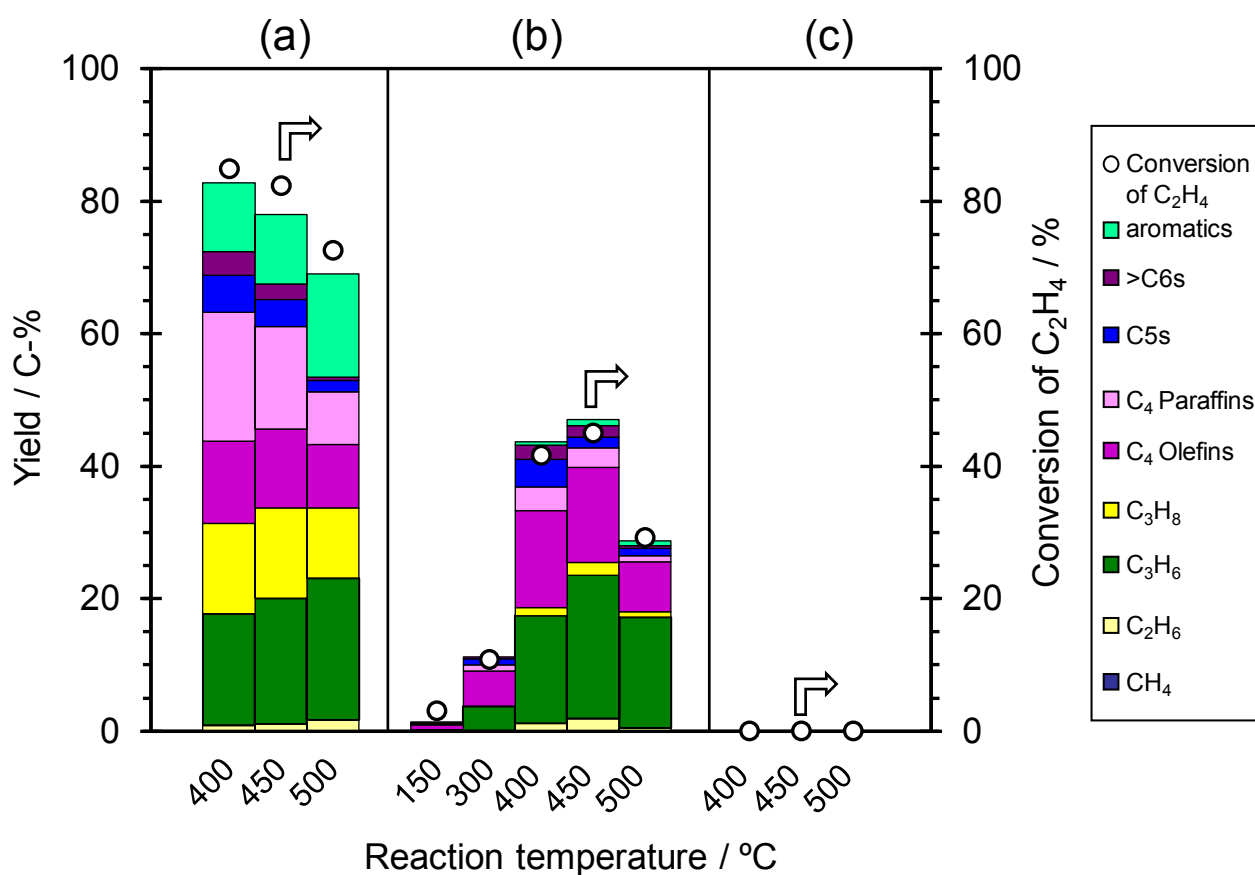

Figure S8. The product yield and conversion of ethylene over (a) ZSM-5, (b)  $\text{TiO}_2(\text{mc})/\text{ZSM-5}_{800}$ , and (c)  $\text{TiO}_2(\text{mc})/\text{silicalite-1}_{800}$  for the ETP reaction at 150, 300, 400, 450 and 500 °C.

Reaction conditions: feed gas,  $\text{C}_2\text{H}_4:\text{He} = 2.5:27.5 \text{ cm}^3 (\text{SATP}) \text{ min}^{-1}$ ;  $W_{\text{zeolite}}/F_{\text{ethylene}}$ , 16.4 g-cat. h  $\text{mol}^{-1}$ ; time on stream, 5 min.

Pretreatment conditions: temperature, 550 °C; period, 60 min; air flow rate,  $30 \text{ cm}^3 (\text{SATP}) \text{ min}^{-1}$ .

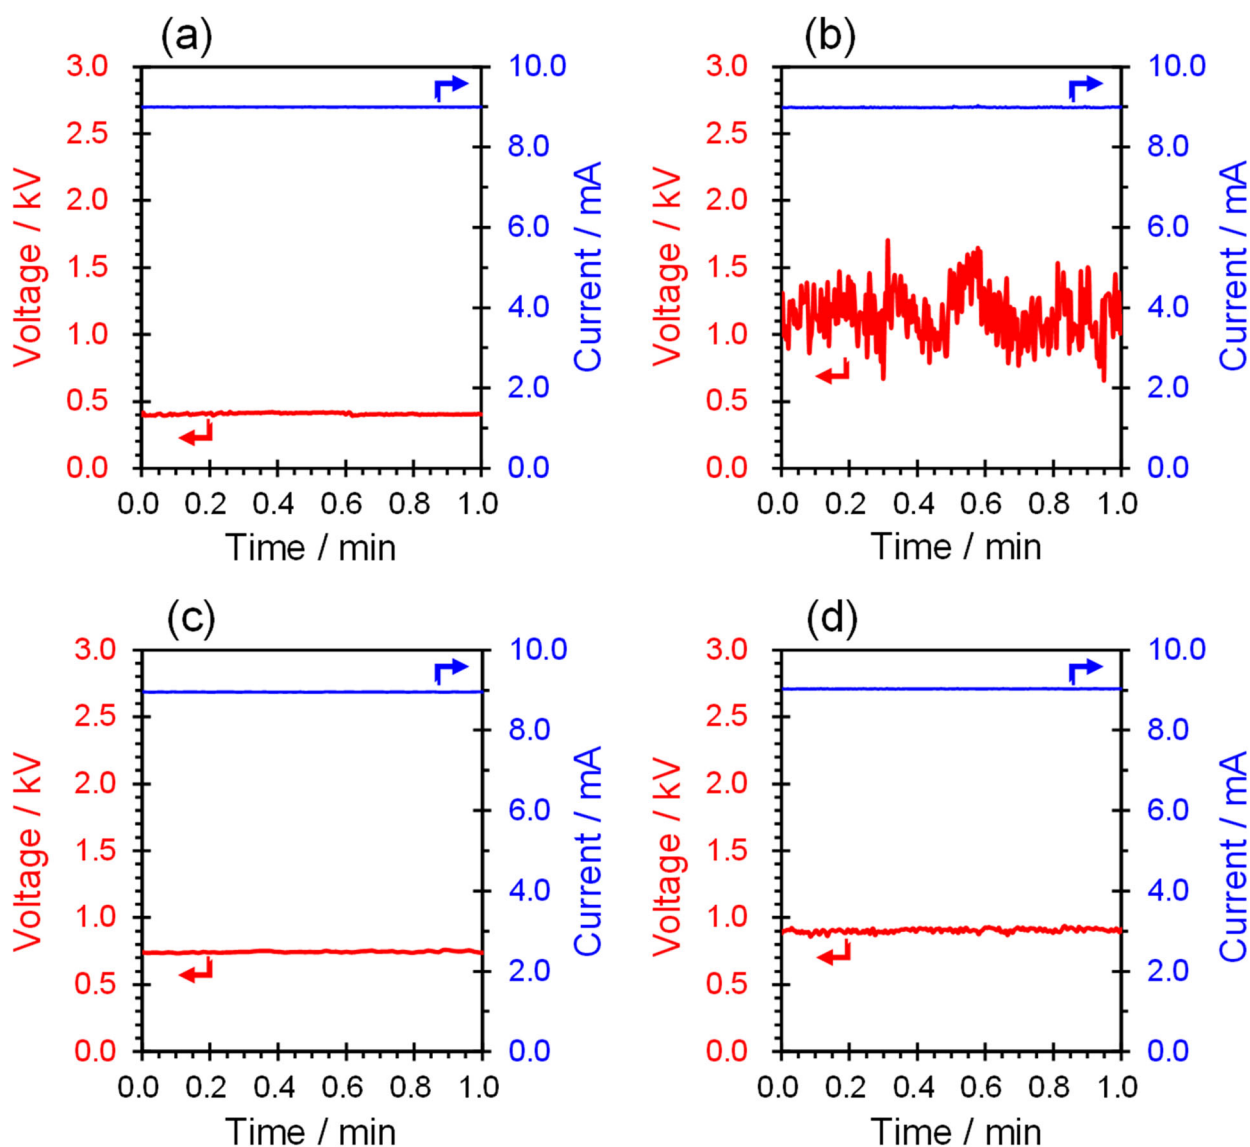

Figure S9. Typical time courses of the voltage and the current for catalyst beds composed of (a)  $\text{TiO}_2$ , (b)  $\text{TiO}_2(\text{pm})/\text{ZSM-5}_{800}$ , (c)  $\text{TiO}_2(\text{mc})/\text{ZSM-5}_{800}$ , and (d)  $\text{TiO}_2(\text{mc})/\text{silicalite-1}_{800}$ . Reaction conditions: input current, 9 mA; catalyst, 100 mg; feed gas,  $\text{CH}_4:\text{O}_2:\text{Ar} = 25:15:60 \text{ cm}^3 (\text{SATP}) \text{ min}^{-1}$ ; preset furnace temperature, 150 °C. Pretreatment conditions: temperature, 300 °C; period, 30 min; Ar flow rate, 60  $\text{cm}^3 (\text{SATP}) \text{ min}^{-1}$ .

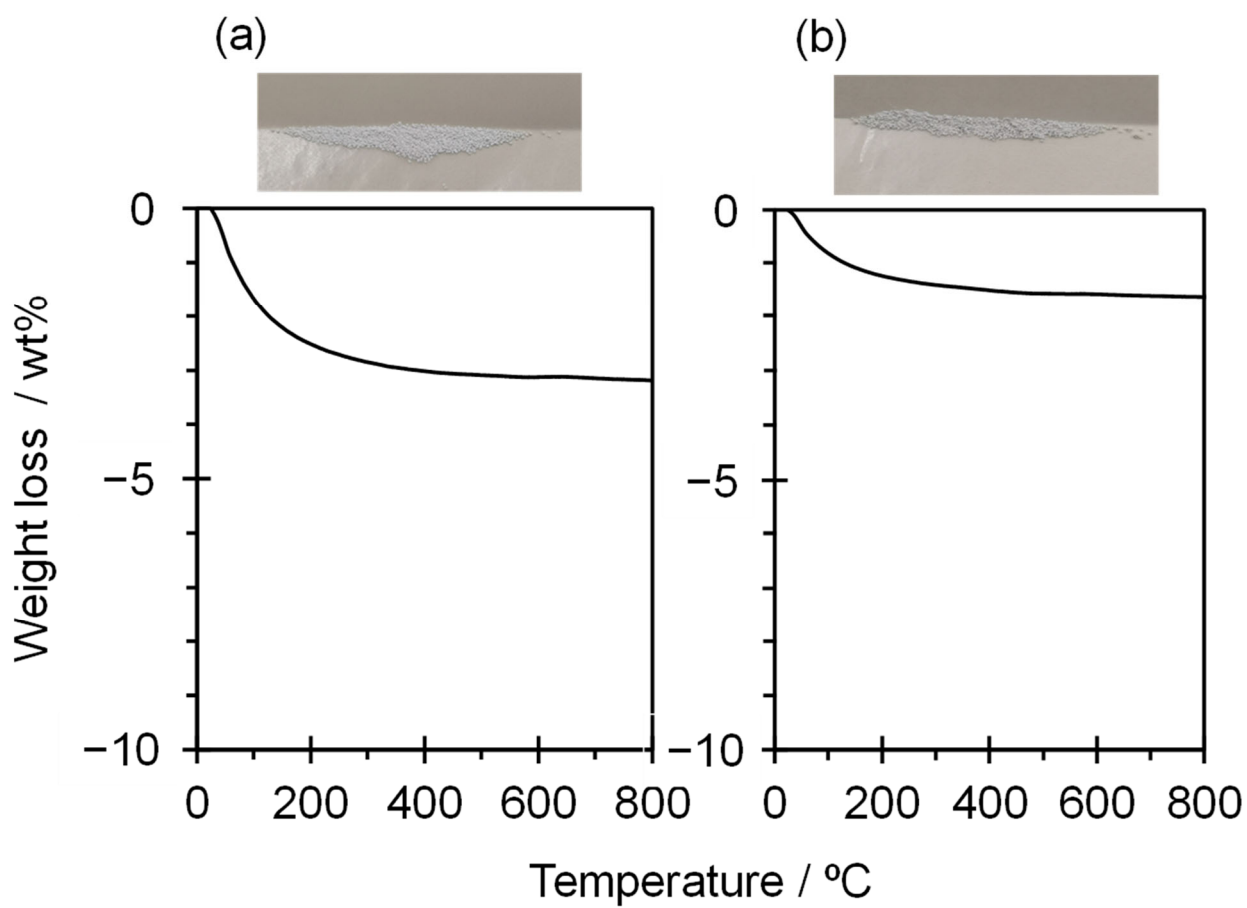

Figure S10. TG-DTA profiles and the photos of  $\text{TiO}_2(\text{mc})/\text{ZSM-5}_{800}$  (a) before and (b) after OCM reaction under application of an electric field.

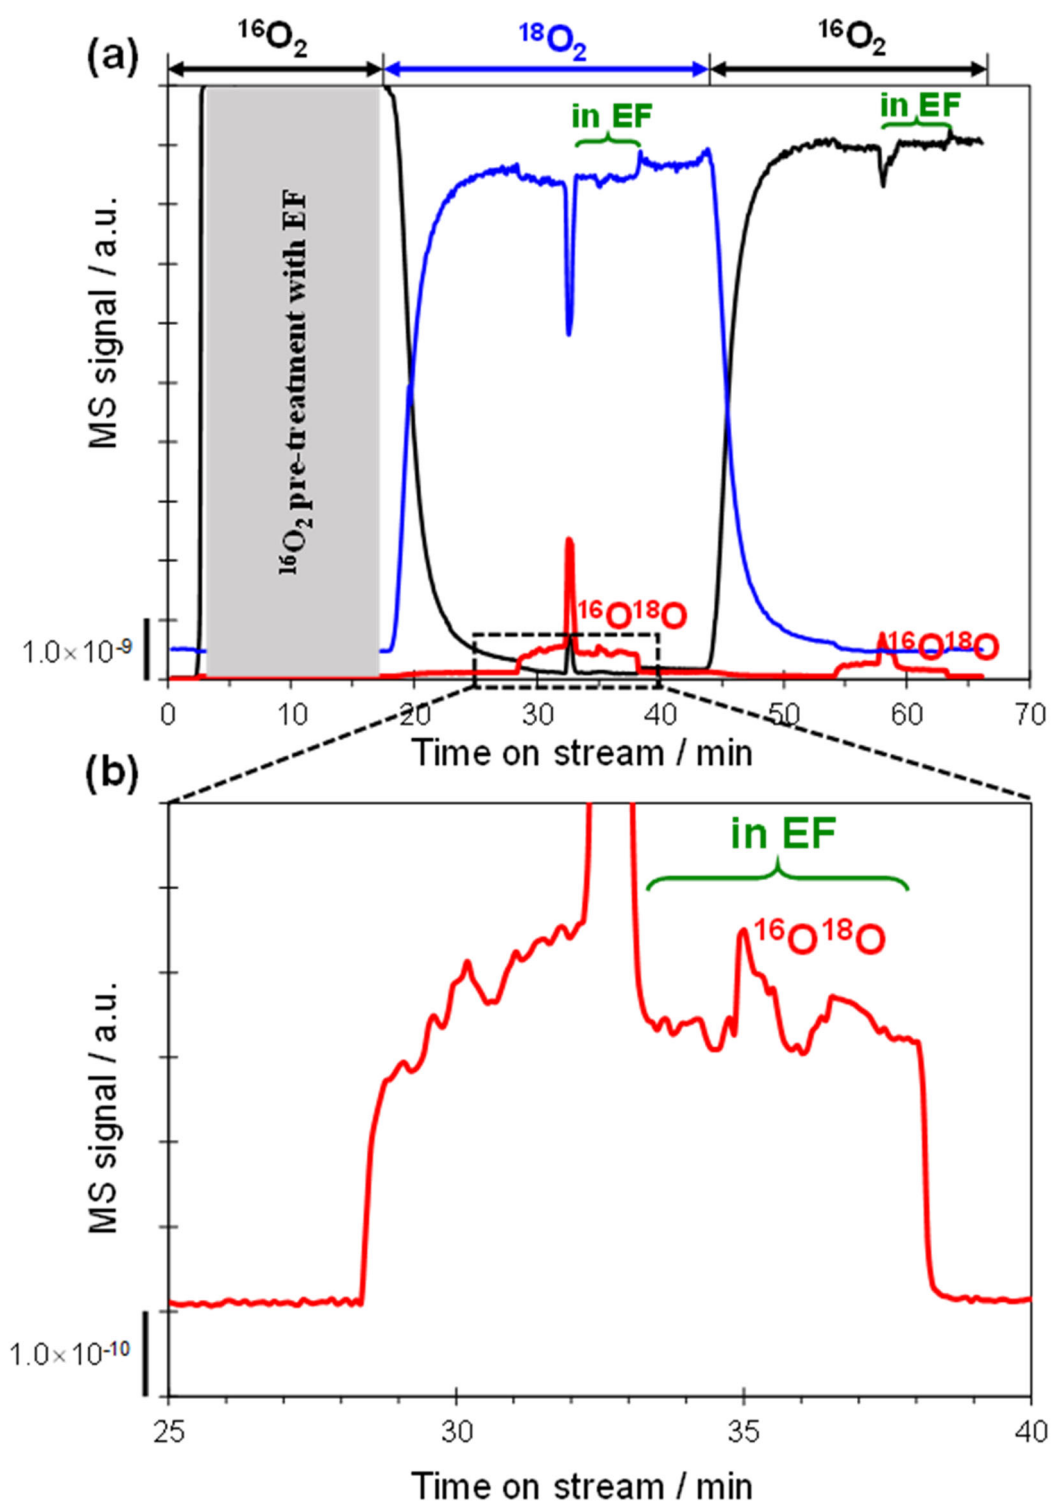

Figure S11A. (a) A full-range view and (b) a magnified view of the changes in MS signals of  $^{16}\text{O}_2$  (black line),  $^{16}\text{O}^{18}\text{O}$  (red line), and  $^{18}\text{O}_2$  (blue line) during isotopic oxygen exchange experiments over  $\text{TiO}_2(\text{mc})/\text{ZSM-5}_{800}$  at 150 °C in an electric field.

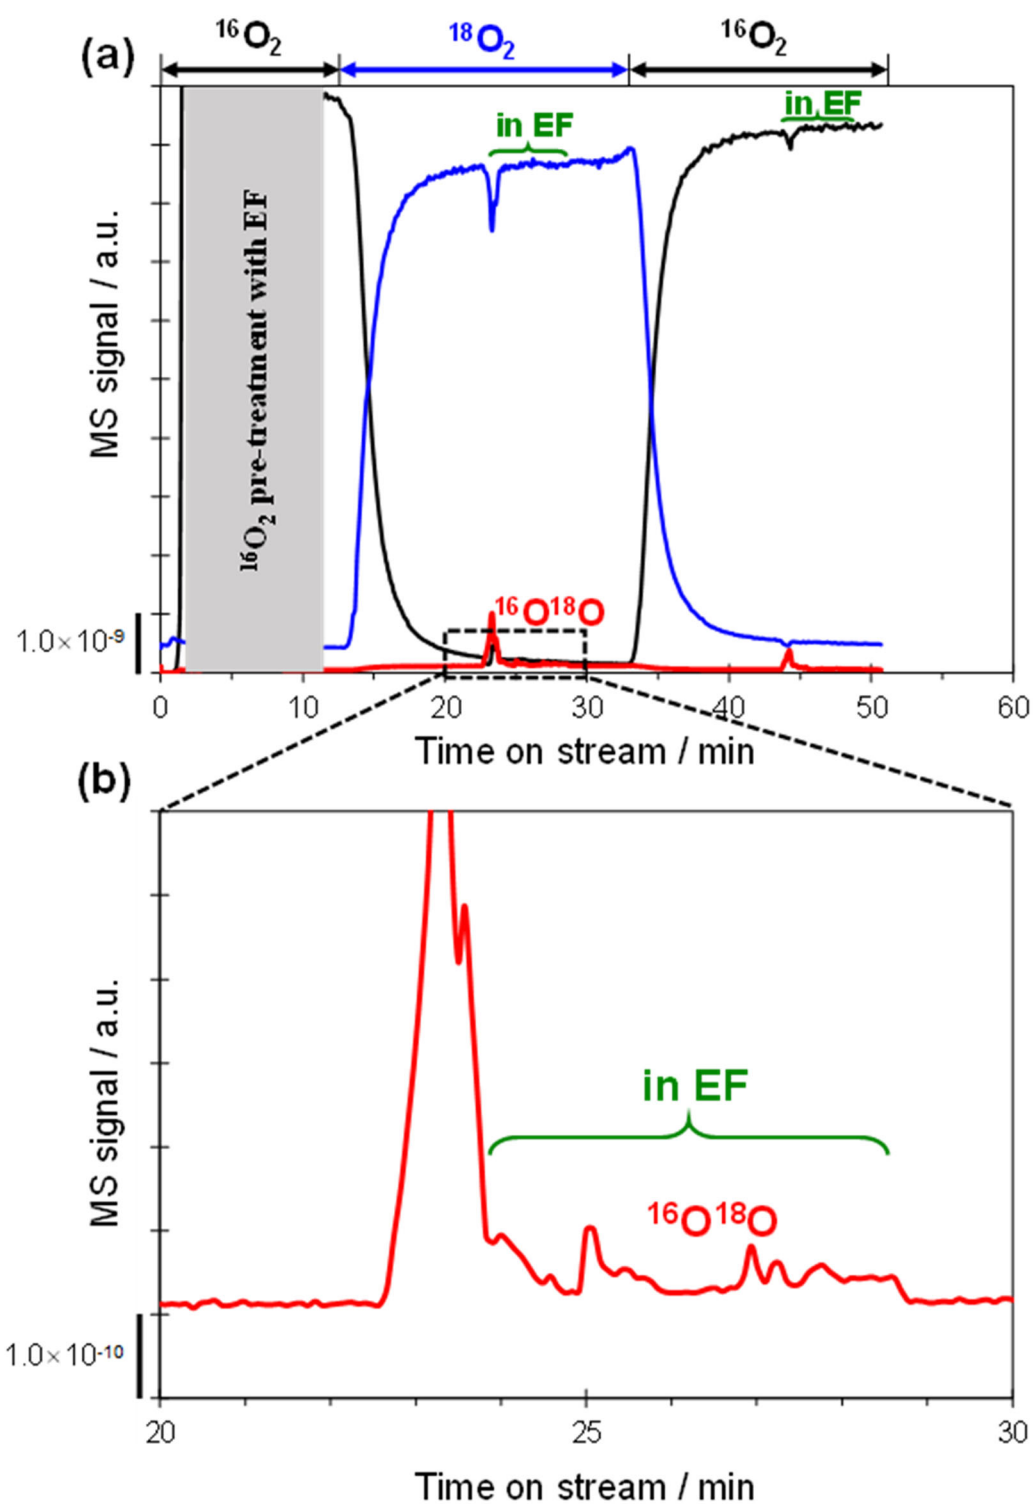

Figure S11B. (a) A full-range view and (b) a magnified view of the changes in MS signals of  $^{16}\text{O}_2$  (black line),  $^{16}\text{O}^{18}\text{O}$  (red line), and  $^{18}\text{O}_2$  (blue line) during isotopic oxygen exchange experiments over  $\text{TiO}_2$ \_800 at 150 °C in an electric field.

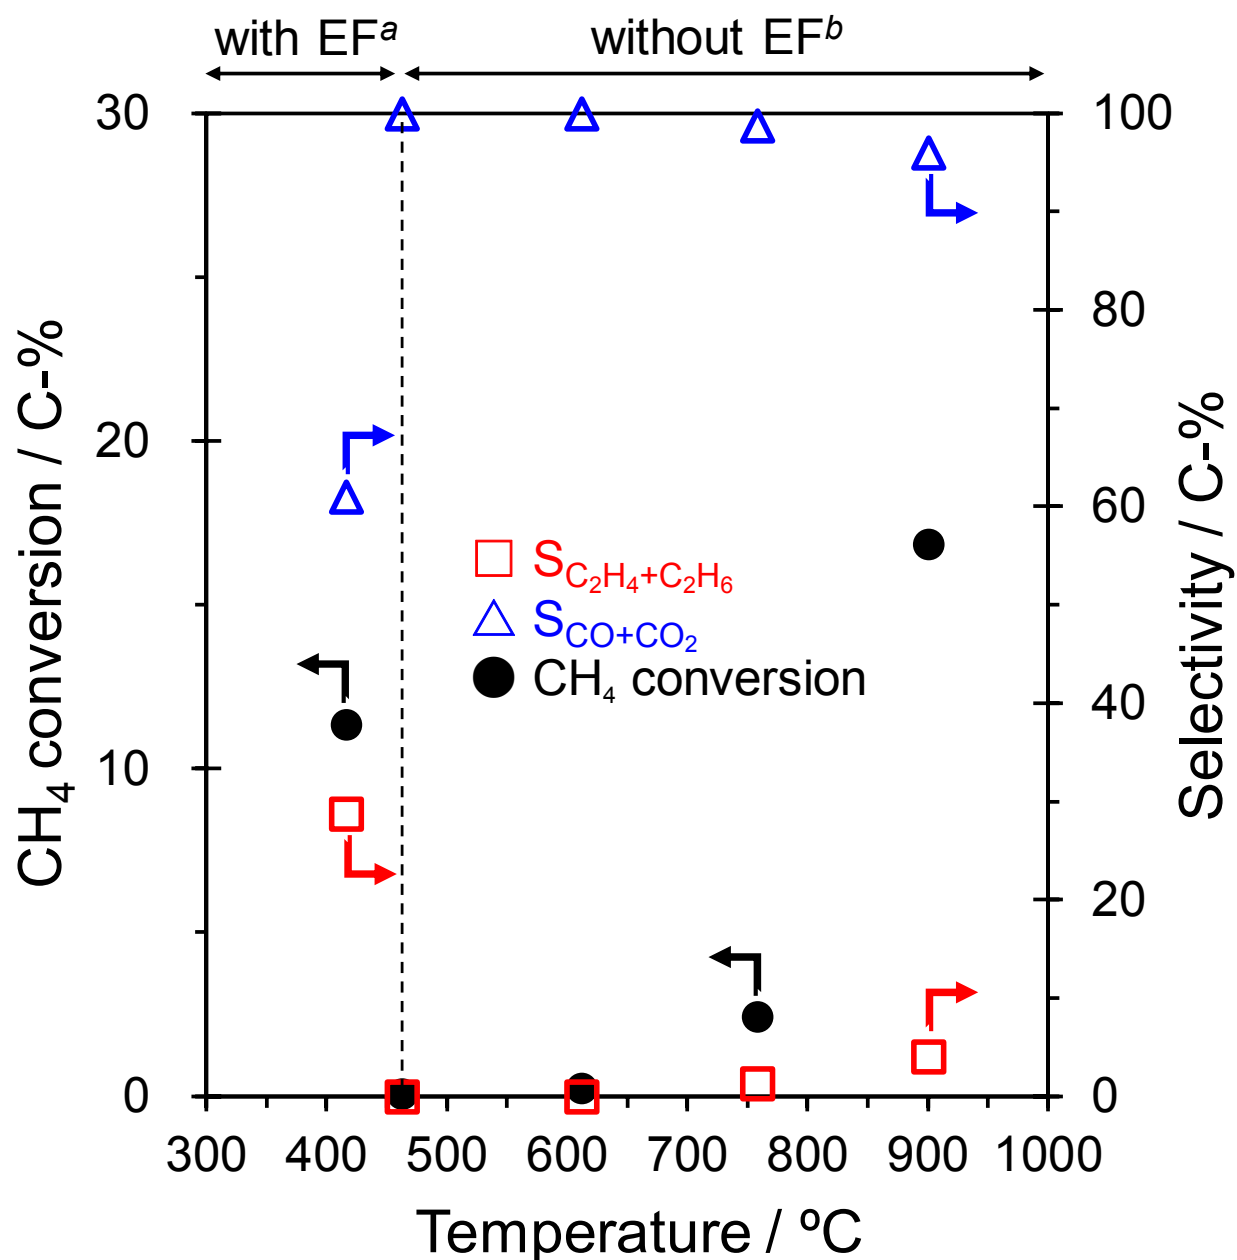

Figure S12. Influence of an electric field on the catalytic activity of  $\text{TiO}_2(\text{mc})/\text{ZSM-5}_{800}$ .

The selectivity of products and conversion of methane in the OCM reaction over  $\text{TiO}_2(\text{mc})/\text{ZSM-5}_{800}$  with or without an electric field are plotted.

Reaction conditions:

<sup>a</sup>catalyst, 100 mg; preset furnace temperature, 150  $^{\circ}\text{C}$ ; input current, 6.0 mA; feed gas,  $\text{CH}_4:\text{O}_2:\text{Ar} = 25:15:60 \text{ cm}^3 (\text{SATP}) \text{ min}^{-1}$ .

<sup>b</sup>catalyst, 100 mg; preset furnace temperature, 450, 600, 750, 900  $^{\circ}\text{C}$ ; feed gas,  $\text{CH}_4:\text{O}_2:\text{Ar} = 25:15:60 \text{ cm}^3 (\text{SATP}) \text{ min}^{-1}$ .

Pretreatment conditions: furnace temperature, 300  $^{\circ}\text{C}$ ; period, 30 min; Ar flow rate, 60  $\text{cm}^3 (\text{SATP}) \text{ min}^{-1}$ .

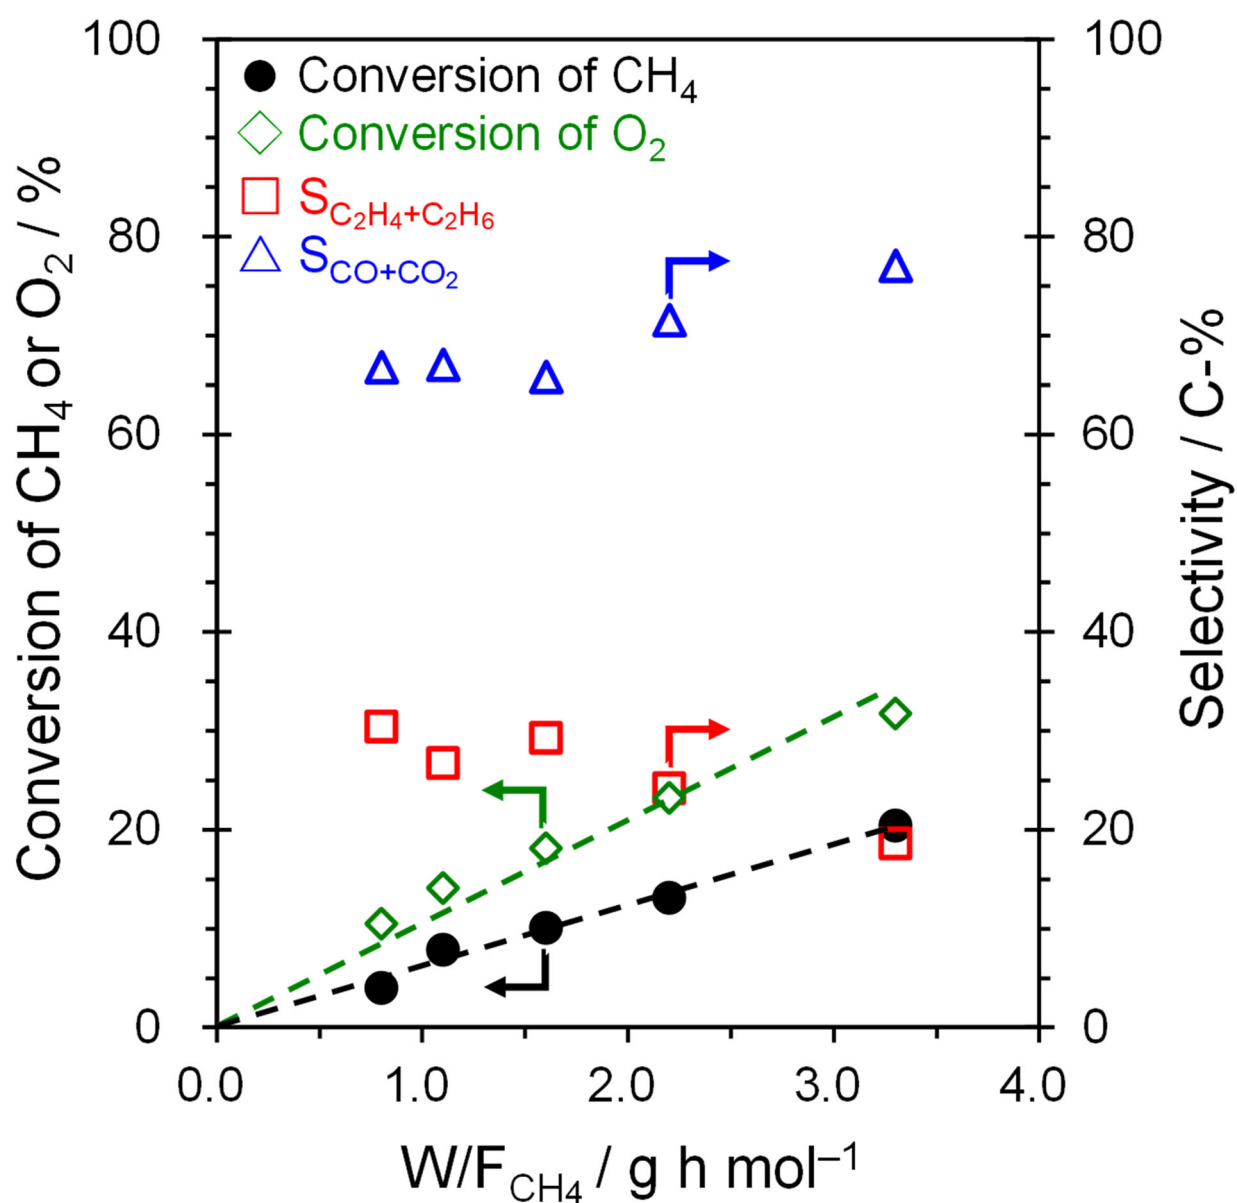

Figure S13. Influence of  $W/F_{methane}$  on the catalytic activity for OCM over  $TiO_2(mc)/ZSM-5_{800}$  under application of an electric field.

Reaction conditions: catalyst, 100 mg; input current, 7.0 mA; feed gas,  $CH_4:O_2:Ar = 5x:3x:12x$  (total flow rate: 50, 75, 100, 150, 200  $cm^3$  (SATP)  $min^{-1}$ ); preset furnace temperature, 150 °C.

Pretreatment conditions: temperature, 300 °C; period, 30 min; Ar flow rate, 60  $cm^3$  (SATP)  $min^{-1}$ .

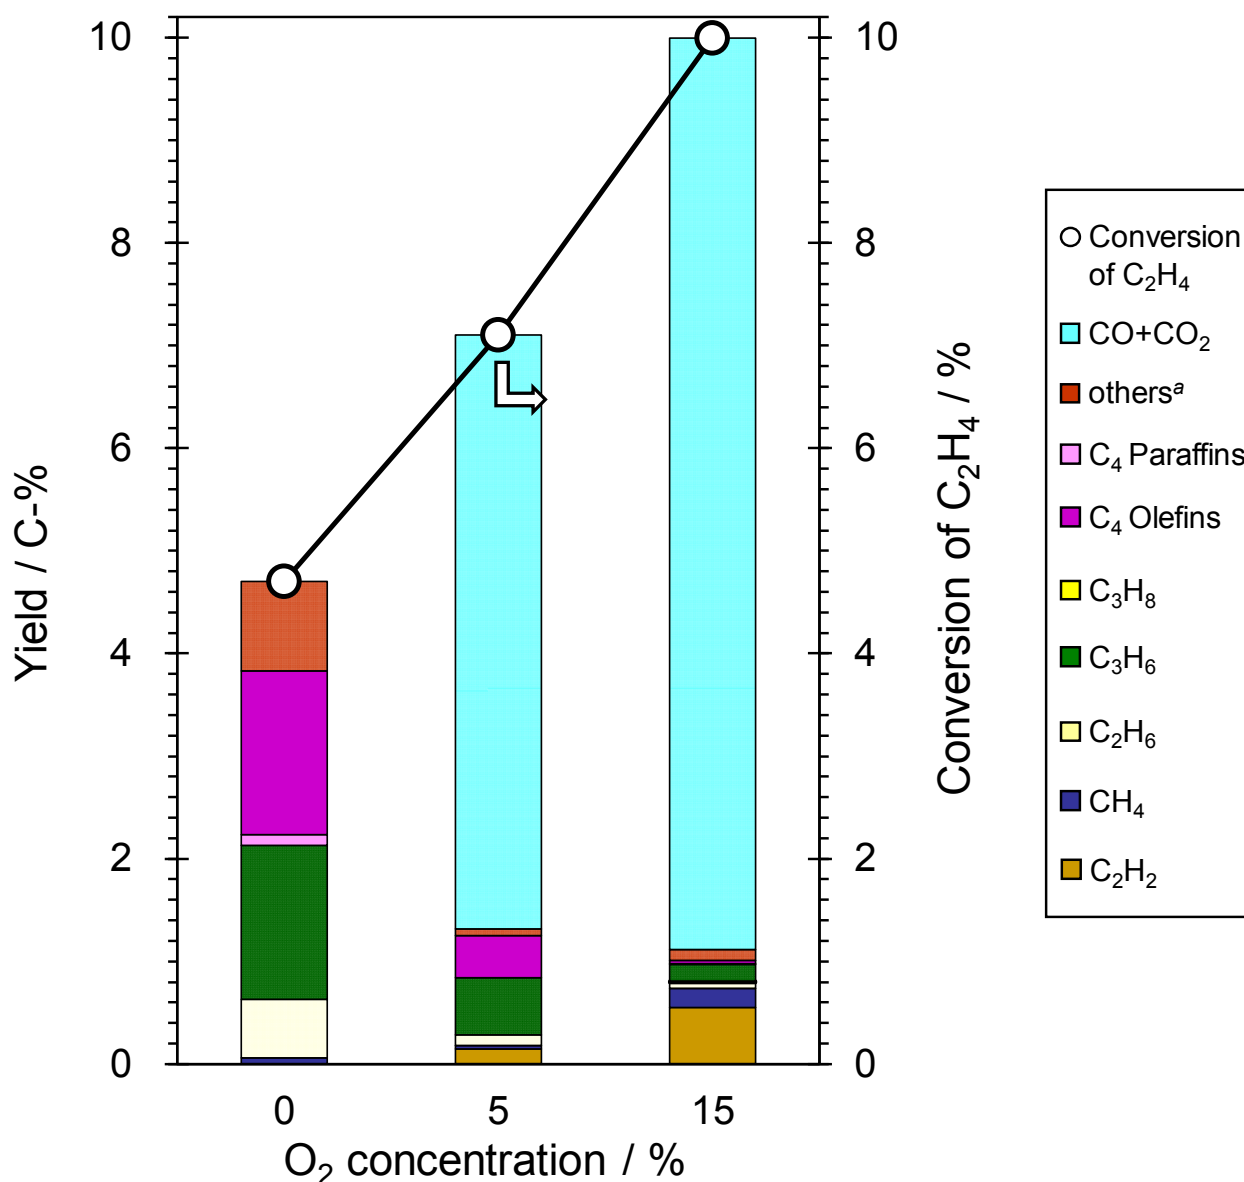

Figure S14. Influence of O<sub>2</sub> partial pressure on the catalytic activity in the ETP reaction over TiO<sub>2</sub>(mc)/ZSM-5\_800 under application of an electric field.

The catalyst bed temperatures during 0, 5 and 15 vol% of O<sub>2</sub> concentration were 225, 300 and 324 °C, respectively.

<sup>a</sup> The fraction of others indicates the sum of C<sub>5</sub>s, >C<sub>6</sub>s, and aromatics produced.

Reaction conditions: catalyst, 100 mg; feed gas, C<sub>2</sub>H<sub>4</sub>:O<sub>2</sub>:Ar = 25:  $x$ :(75- $x$ ) cm<sup>3</sup> (SATP) min<sup>-1</sup>; W<sub>zeolite</sub>/F<sub>ethylene</sub>, 0.75 g-cat. h mol<sup>-1</sup>; input current, 5.0 mA; preset furnace temperature, 150 °C.

Pretreatment conditions: temperature, 300 °C; period, 30 min; Ar flow rate, 60 cm<sup>3</sup> (SATP) min<sup>-1</sup>.



## Supplementary Tables

Table S1. Product yield in the ethylene-to-propylene (ETP) reaction at 450 °C

| Catalyst                               | Conversion<br>of C <sub>2</sub> H <sub>4</sub> <sup>a</sup><br>(%) | Product distribution <sup>b</sup> (C-%)            |                               |                               |                  |                |                                      |                 |           | Material<br>balance <sup>c</sup><br>(C-%) |
|----------------------------------------|--------------------------------------------------------------------|----------------------------------------------------|-------------------------------|-------------------------------|------------------|----------------|--------------------------------------|-----------------|-----------|-------------------------------------------|
|                                        |                                                                    | CH <sub>4</sub> +<br>C <sub>2</sub> H <sub>6</sub> | C <sub>3</sub> H <sub>8</sub> | C <sub>3</sub> H <sub>6</sub> | C <sub>4</sub> = | C <sub>4</sub> | C <sub>5</sub> +<br>C <sub>5</sub> = | >C <sub>6</sub> | aromatics |                                           |
| ZSM-5                                  | 82                                                                 | 1.4                                                | 17.5                          | 24.3                          | 15.2             | 19.9           | 5.2                                  | 3.1             | 13.4      | 96                                        |
| TiO <sub>2</sub> (mc)/ZSM-5_800        | 45                                                                 | 4.0                                                | 4.0                           | 46.2                          | 30.6             | 6.3            | 3.5                                  | 3.8             | 1.8       | 102                                       |
| TiO <sub>2</sub> (mc)/silicalite-1_800 | 0                                                                  | 0.0                                                | 0.0                           | 0.0                           | 0.0              | 0.0            | 0.0                                  | 0.0             | 0.0       | 100                                       |

<sup>a</sup> Conversion of C<sub>2</sub>H<sub>4</sub> = {(C-atoms of ethylene<sub>input</sub>) – (C-atoms of ethylene<sub>output</sub>)} / (C-atoms of ethylene<sub>input</sub>).

<sup>b</sup> Product distribution = {(C-atoms of each product) / (sum of C-atoms of products)} × 100.

<sup>c</sup> Material balance = (total C-atoms of products + ethylene<sub>output</sub>) / (C-atoms of ethylene<sub>input</sub>) × 100.

Table S2. Influence of  $W/F_{\text{methane}}$  on the catalytic activity for OCM over  $\text{TiO}_2(\text{mc})/\text{ZSM-5}_{800}$  in an electric field

| $W/F_{\text{methane}}$<br>( $\text{g h mol}^{-1}$ ) | Input<br>current<br>(mA) | Preset<br>furnace<br>temperature<br>( $^{\circ}\text{C}$ ) | Temp. <sup>a</sup><br>( $^{\circ}\text{C}$ ) | Conversion<br>(C-%) |              |             |               | Selectivity<br>(C-%)   |                        |                        |                        | Yield<br>(C-%) |                        |
|-----------------------------------------------------|--------------------------|------------------------------------------------------------|----------------------------------------------|---------------------|--------------|-------------|---------------|------------------------|------------------------|------------------------|------------------------|----------------|------------------------|
|                                                     |                          |                                                            |                                              | $\text{CH}_4$       | $\text{O}_2$ | $\text{CO}$ | $\text{CO}_2$ | $\text{C}_2\text{H}_6$ | $\text{C}_2\text{H}_4$ | $\text{C}_2\text{H}_2$ | $\text{C}_3\text{H}_6$ | $\text{C}_2^b$ | $\text{C}_3\text{H}_6$ |
| 0.8                                                 |                          |                                                            | 433                                          | 4.0                 | 10.5         | 62.5        | 4.3           | 17.7                   | 12.7                   | 1.1                    | 1.6                    | 1.26           | 0.07                   |
| 1.1                                                 |                          |                                                            | 425                                          | 7.9                 | 14.1         | 63.6        | 3.5           | 13.4                   | 13.4                   | 3.2                    | 2.6                    | 2.35           | 0.24                   |
| 1.6                                                 | 7                        | 150                                                        | 415                                          | 10.1                | 18.1         | 62.9        | 2.9           | 13.1                   | 16.2                   | 2.5                    | 1.9                    | 3.19           | 0.25                   |
| 2.2                                                 |                          |                                                            | 395                                          | 13.1                | 23.1         | 68.0        | 3.6           | 10.7                   | 13.5                   | 2.5                    | 1.2                    | 3.51           | 0.22                   |
| 3.3                                                 |                          |                                                            | 394                                          | 20.4                | 31.8         | 73.1        | 4.0           | 7.7                    | 10.9                   | 4.0                    | 0.3                    | 4.61           | 0.06                   |

<sup>a</sup> Catalyst bed temperature measured by a thermocouple.<sup>b</sup>  $\text{C}_2$  yield means the sum of  $\text{C}_2\text{H}_6$ ,  $\text{C}_2\text{H}_4$ , and  $\text{C}_2\text{H}_2$  yields.Reaction conditions: catalyst, 100 mg; feed gas,  $\text{CH}_4:\text{O}_2:\text{Ar} = 5x:3x:12x$  (total flow rate: 50, 75, 100, 150, 200  $\text{cm}^3$  (SATP)  $\text{min}^{-1}$ ).Pretreatment conditions: temperature, 300  $^{\circ}\text{C}$ ; period, 30 min; Ar flow rate, 60  $\text{cm}^3$  (SATP)  $\text{min}^{-1}$ .

Table S3. Influence of  $W/F_{\text{ethane}}$  on the catalytic activity for ODH over  $\text{TiO}_2(\text{mc})/\text{ZSM-5}_{800}$  in an electric field

| $W/F_{\text{ethane}}$<br>( $\text{g h mol}^{-1}$ ) | Input<br>current<br>(mA) | Preset<br>furnace<br>temperature<br>( $^{\circ}\text{C}$ ) | Temp. <sup>c</sup><br>( $^{\circ}\text{C}$ ) | Conversion<br>(%)        |                |                        |      | Selectivity <sup>d</sup><br>(C-%) |               |                        |                        | Yield <sup>e</sup><br>(C-%) |                        |                        |
|----------------------------------------------------|--------------------------|------------------------------------------------------------|----------------------------------------------|--------------------------|----------------|------------------------|------|-----------------------------------|---------------|------------------------|------------------------|-----------------------------|------------------------|------------------------|
|                                                    |                          |                                                            |                                              | $\text{C}_2\text{H}_6^b$ | $\text{O}_2^c$ | $\text{C}_2\text{H}_4$ | CO   | $\text{CO}_2$                     | $\text{CH}_4$ | $\text{C}_2\text{H}_2$ | $\text{C}_3\text{H}_6$ | $\text{C}_2\text{H}_4$      | $\text{C}_2\text{H}_2$ | $\text{C}_3\text{H}_6$ |
| 1.5                                                | 6                        | 150                                                        | 306                                          | 28.4                     | 25.8           | 54.7                   | 25.6 | 2.6                               | 9.6           | 5.0                    | 1.2                    | 15.6                        | 1.4                    | 0.33                   |
| 3.0                                                |                          |                                                            | 304                                          | 51.0                     | 55.5           | 48.7                   | 29.6 | 3.2                               | 10.7          | 5.9                    | 1.0                    | 24.9                        | 3.0                    | 0.51                   |

<sup>a</sup> Catalyst bed temperature measured by a thermocouple.<sup>b</sup>  $\text{C}_2\text{H}_6$  conversion (%) = {(sum of C-atom moles of each product)/(C-atom moles of input  $\text{C}_2\text{H}_6$ )}  $\times$  100.<sup>c</sup>  $\text{O}_2$  conversion (%) = {(moles of  $\text{O}_2$  consumed)/(input moles of  $\text{O}_2$ )}  $\times$  100.<sup>d</sup> Product selectivity (C-%) = {(product yield)/( $\text{C}_2\text{H}_6$  conversion)}  $\times$  100.<sup>e</sup> Product yield (C-%) = {(C-atom moles of each product)/(C-atom moles of input  $\text{C}_2\text{H}_6$ )}  $\times$  100.Reaction conditions: catalyst, 100 mg; feed gas,  $\text{C}_2\text{H}_6:\text{O}_2:\text{Ar} = 5x:3x:12x$  (total flow rate: 100, 200  $\text{cm}^3$  (SATP)  $\text{min}^{-1}$ ).Pretreatment conditions: temperature, 300  $^{\circ}\text{C}$ ; period, 30 min; Ar flow rate, 60  $\text{cm}^3$  (SATP)  $\text{min}^{-1}$ .

Table S4. Evaluation of the reaction through CO and H<sub>2</sub> to C<sub>2</sub> hydrocarbons over ZSM-5 zeolite

| Reactant gas flow rate                      |                |      | Preset furnace temperature <sup>a</sup> | Conversion |                |                               | Selectivity                   |                               | Yield                       |
|---------------------------------------------|----------------|------|-----------------------------------------|------------|----------------|-------------------------------|-------------------------------|-------------------------------|-----------------------------|
| (cm <sup>3</sup> (SATP) min <sup>-1</sup> ) |                |      | (°C)                                    | (%)        |                |                               | (C-%)                         |                               | (C-%)                       |
| CO/He(10%)                                  | H <sub>2</sub> | He   |                                         | CO         | H <sub>2</sub> | C <sub>2</sub> H <sub>6</sub> | C <sub>2</sub> H <sub>4</sub> | C <sub>2</sub> H <sub>2</sub> | C <sub>2</sub> <sup>b</sup> |
| 29.6                                        | 1.6            | 68.8 | 400                                     | 0.0        | 0.0            | 0.0                           | 0.0                           | 0.0                           | 0.0                         |
|                                             |                |      | 500                                     | 0.0        | 0.0            | 0.0                           | 0.0                           | 0.0                           | 0.0                         |
|                                             |                |      | 600                                     | 0.0        | 0.0            | 0.0                           | 0.0                           | 0.0                           | 0.0                         |
|                                             |                |      | 700                                     | 0.0        | 0.0            | 0.0                           | 0.0                           | 0.0                           | 0.0                         |
|                                             | 3.2            | 67.2 | 400                                     | 0.0        | 0.0            | 0.0                           | 0.0                           | 0.0                           | 0.0                         |
|                                             |                |      | 500                                     | 0.0        | 0.0            | 0.0                           | 0.0                           | 0.0                           | 0.0                         |
|                                             |                |      | 600                                     | 0.0        | 0.0            | 0.0                           | 0.0                           | 0.0                           | 0.0                         |
|                                             |                |      | 700                                     | 0.0        | 0.0            | 0.0                           | 0.0                           | 0.0                           | 0.0                         |
|                                             | 6.4            | 64.0 | 400                                     | 0.0        | 0.0            | 0.0                           | 0.0                           | 0.0                           | 0.0                         |
|                                             |                |      | 500                                     | 0.0        | 0.0            | 0.0                           | 0.0                           | 0.0                           | 0.0                         |
|                                             |                |      | 600                                     | 0.0        | 0.0            | 0.0                           | 0.0                           | 0.0                           | 0.0                         |
|                                             |                |      | 700                                     | 0.0        | 0.0            | 0.0                           | 0.0                           | 0.0                           | 0.0                         |

<sup>a</sup> Furnace temperature measured by a thermocouple.<sup>b</sup> C<sub>2</sub> yield means the sum of C<sub>2</sub>H<sub>6</sub>, C<sub>2</sub>H<sub>4</sub>, and C<sub>2</sub>H<sub>2</sub> yields.

Reaction conditions: catalyst, 100 mg.

Pretreatment conditions: temperature, 300 °C; period, 30 min; Ar flow rate, 60 cm<sup>3</sup> (SATP) min<sup>-1</sup>.

Table S5. Temperature dependence on product distribution over TiO<sub>2</sub>(mc)/ZSM-5\_800 in an electric field

| Input current<br>(mA) | Preset furnace temperature<br>(°C) | Temp. <sup>c</sup><br>(°C) | Conversion (%)  |      | Selectivity (C-%) |                               |                               |                               |                               | Yield (C-%)                 |                               |
|-----------------------|------------------------------------|----------------------------|-----------------|------|-------------------|-------------------------------|-------------------------------|-------------------------------|-------------------------------|-----------------------------|-------------------------------|
|                       |                                    |                            | CH <sub>4</sub> | CO   | CO <sub>2</sub>   | C <sub>2</sub> H <sub>6</sub> | C <sub>2</sub> H <sub>4</sub> | C <sub>2</sub> H <sub>2</sub> | C <sub>3</sub> H <sub>6</sub> | C <sub>2</sub> <sup>b</sup> | C <sub>3</sub> H <sub>6</sub> |
| 7.0                   | 150                                | 425                        | 13.1            | 64.0 | 3.0               | 11.4                          | 15.7                          | 4.1                           | 1.5                           | 4.10                        | 0.20                          |
|                       | 200                                | 436                        | 19.2            | 71.2 | 3.7               | 8.9                           | 12.1                          | 3.1                           | 1.0                           | 4.63                        | 0.19                          |
|                       | 300                                | 484                        | 21.7            | 74.6 | 5.0               | 5.9                           | 10.8                          | 2.8                           | 0.8                           | 4.23                        | 0.17                          |
|                       | 400                                | 570                        | 22.5            | 74.6 | 8.3               | 5.3                           | 8.0                           | 3.1                           | 0.6                           | 3.69                        | 0.14                          |
|                       | 500                                | 611                        | 16.7            | 76.7 | 11.4              | 4.9                           | 6.6                           | 0.2                           | 0.2                           | 1.96                        | 0.03                          |
|                       | 600                                | 686                        | 15.2            | 74.2 | 13.7              | 5.9                           | 6.1                           | 0.0                           | 0.1                           | 1.83                        | 0.02                          |
|                       | 700                                | 758                        | 14.2            | 77.9 | 16.8              | 2.8                           | 2.5                           | 0.0                           | 0.0                           | 0.76                        | 0.00                          |

<sup>a</sup> Catalyst bed temperature measured with a thermocouple.<sup>b</sup> C<sub>2</sub> yield means the sum of C<sub>2</sub>H<sub>6</sub>, C<sub>2</sub>H<sub>4</sub>, and C<sub>2</sub>H<sub>2</sub> yields.Reaction conditions: catalyst, 100 mg; feed gas, CH<sub>4</sub>:O<sub>2</sub>:Ar = 25:15:60 cm<sup>3</sup> (SATP) min<sup>-1</sup>.Pretreatment conditions: temperature, 300 °C; period, 30 min; Ar flow rate, 60 cm<sup>3</sup> (SATP) min<sup>-1</sup>.
